# Supplementary material
Source: PubMed Central journal article supplement (PMC135808)
Supplement: nar_30_21_4793__1.pdf [file nar_30_21_4793__1.pdf]

## **Supplementary Material**

# ESI MS of hydrazide oligonucleotide **22**

990478es1#45-51 RT: 1,37-1,54 AV: 7 NL: 2,63E4  
F: - p ms [ 500,00-2000,00]

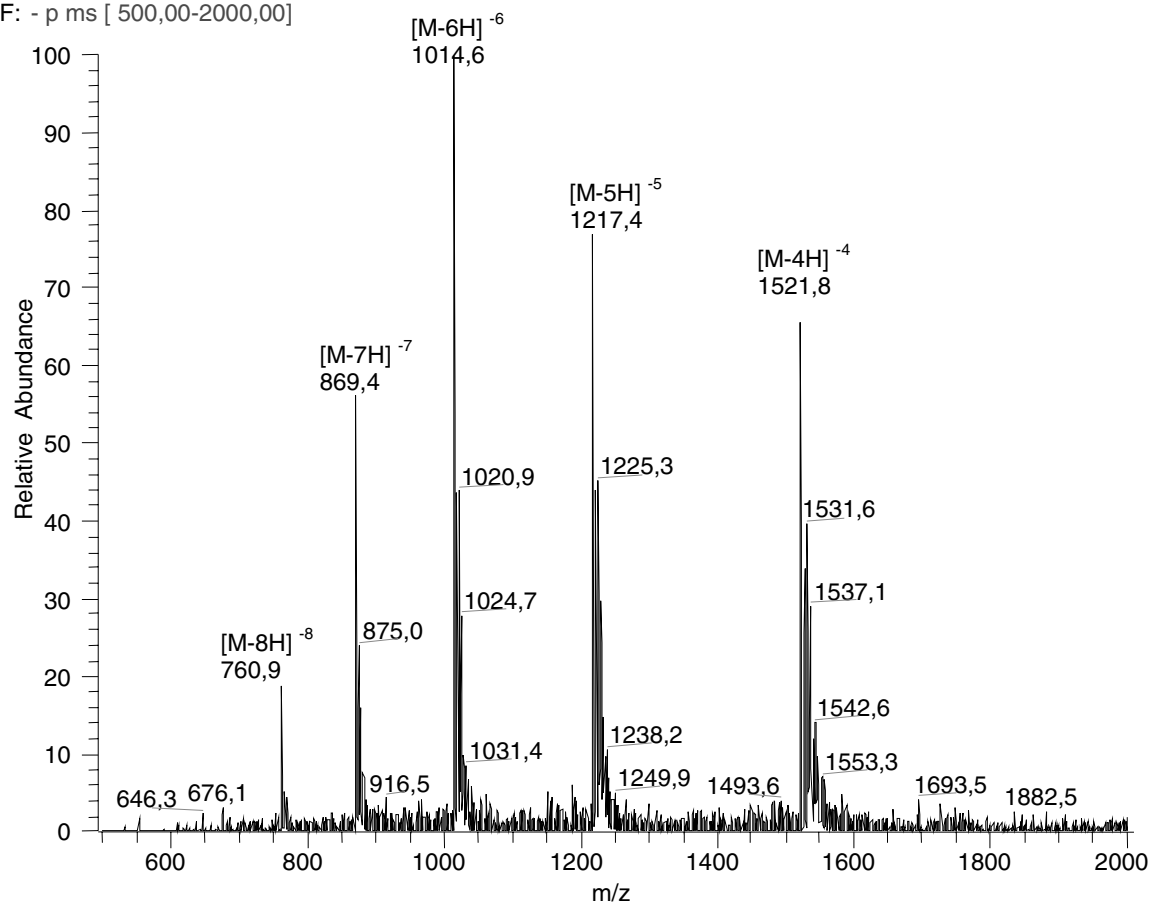

M calc.: 6092 , obs.: 6092

**Agarose gel of a PCR reaction with Hydrazide modified Primers  
compared to standard DNA primers**

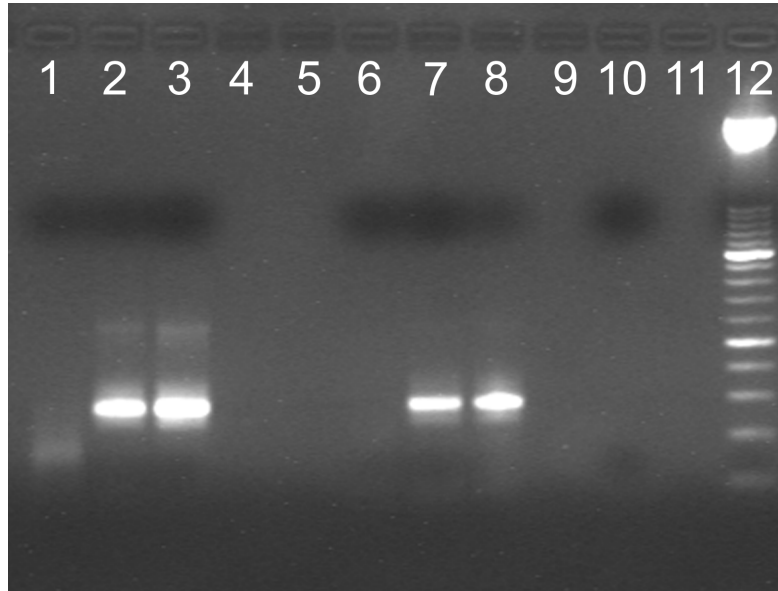

Lanes:

- 1: Control: no template, Hydrazide primer
- 2: Hydrazide primer
- 3: Hydrazide primer
- 4: blank
- 5: blank
- 6: Control: no Target, standard DNA Primer
- 7: Standard DNA Primer
- 8: Standard DNA Primer
- 9: blank
- 10: Water control
- 11: Water control
- 12 Size marker
